# Supplementary material
Source: PubMed Central journal article supplement (PMC5728018)
Supplement: supp_the2017-0149_onco12189-sup-0001-suppinfo01.pdf [file supp_the2017-0149_onco12189-sup-0001-suppinfo01.pdf]

Supplemental Figure for:  
Carcinoid syndrome and costs of care during the first year after diagnosis of neuroendocrine tumors among elderly patients  
Chan Shen et al.

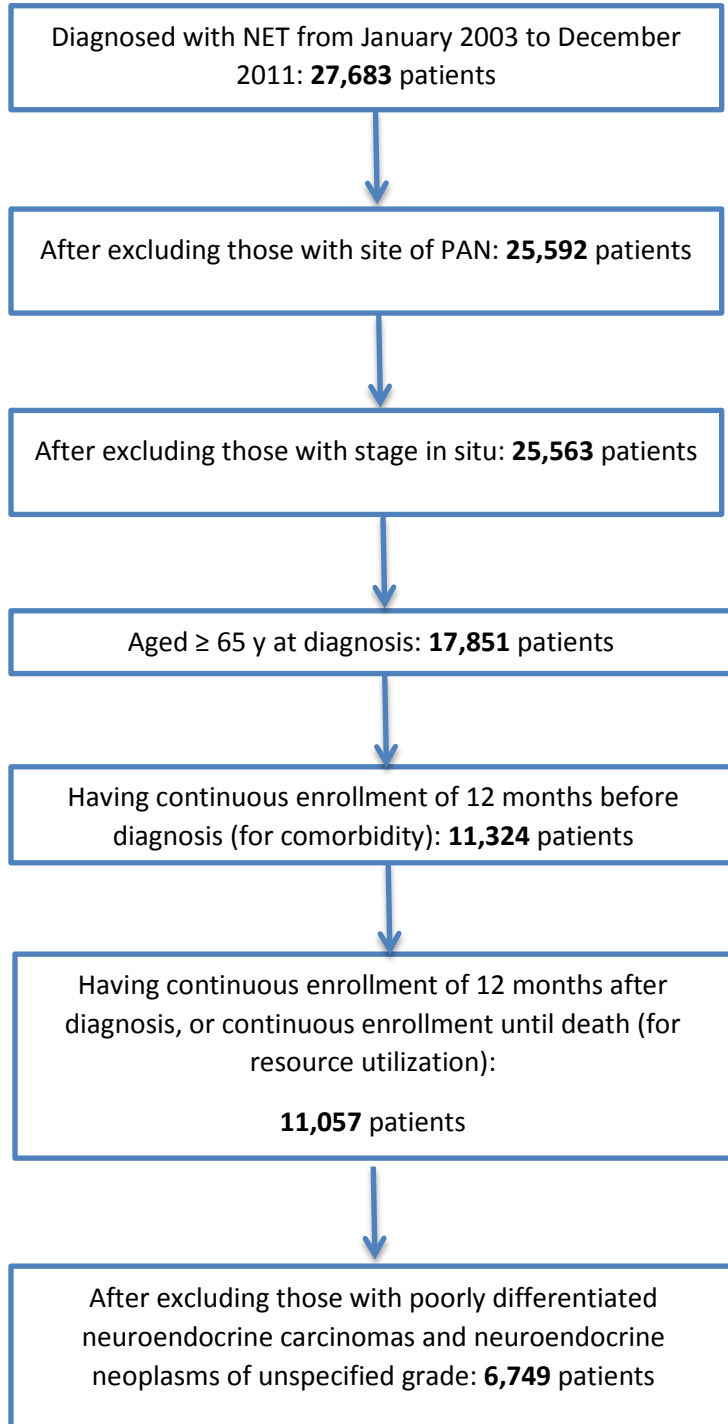

**Figure S1. Flow chart of cohort creation**
